# Supplementary material for: Ferromagnetic hierarchical carbon nanofiber bundles derived from natural collagen fibers: truly lightweight and high-performance microwave absorption materials
Source: Royal Society of Chemistry journal article supplement (doi:10.1039/c5tc02689j), 2015-01-01
Supplement: c5tc02689j1.pdf [file c5tc02689j1.pdf]

## Electronic Supplementary Information (ESI)

### Ferromagnetic hierarchical carbon nanofiber bundle derived from natural collagen fibers: a truly lightweight and high-performance microwave absorption material

Xiaoling Wang<sup>a</sup>, Xin Huang<sup>\*a</sup>, Zerui Chen<sup>b</sup>, Xuepin Liao<sup>\*a,b</sup>, Chang Liu<sup>a</sup>, Bi Shi<sup>\*b</sup>

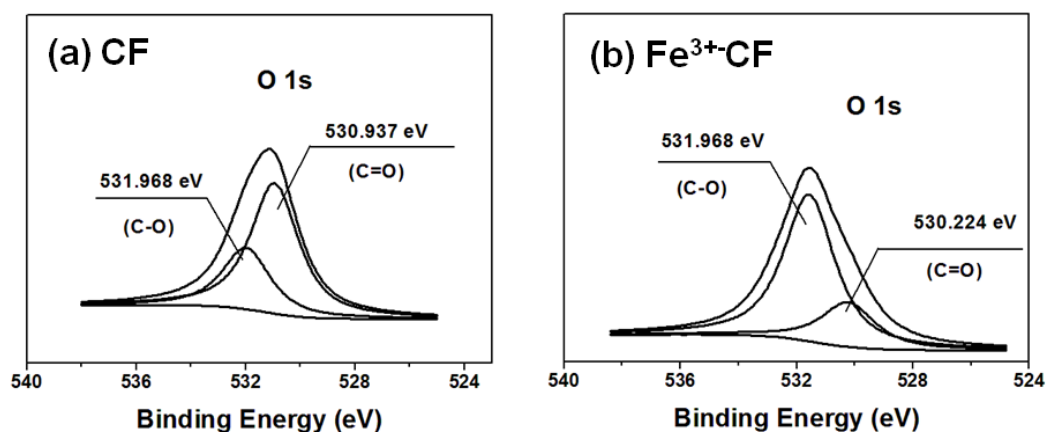

**Fig.S1** O 1s X-ray photoelectron spectroscopy (XPS) spectra of CF (a) and Fe<sup>3+</sup>-CF (b).

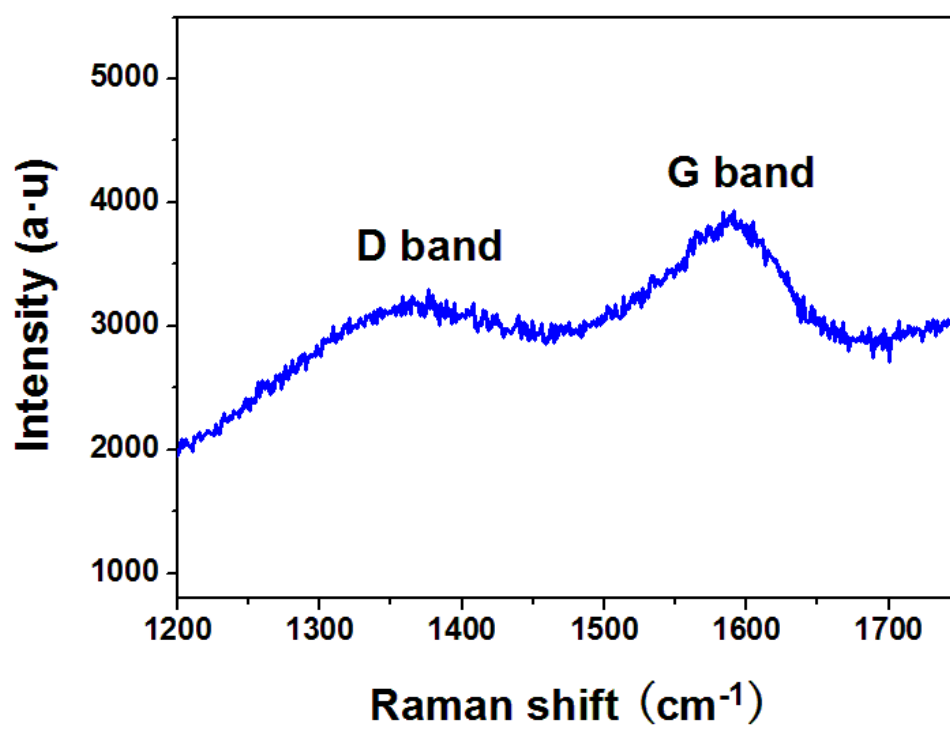

**Fig. S2** The Raman spectra of Fe<sub>3</sub>O<sub>4</sub>-HCNB.

**(a) Fe<sub>3</sub>N-HCNB**

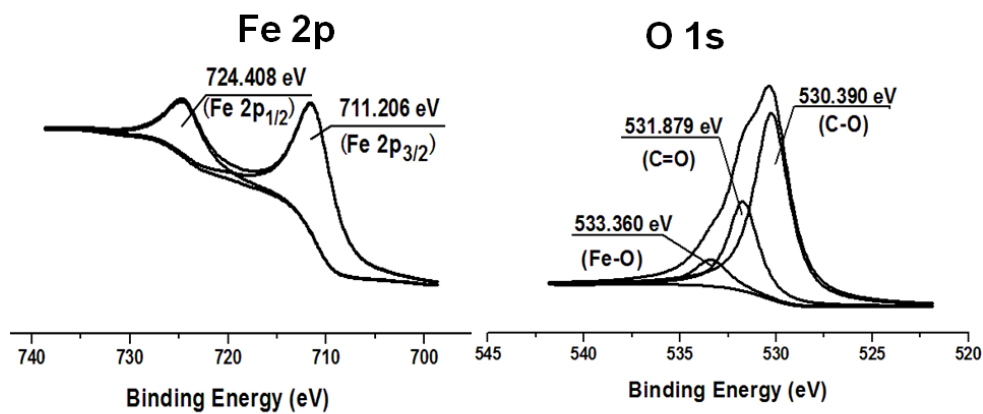

**(b)  $\alpha$ -Fe-HCNB**

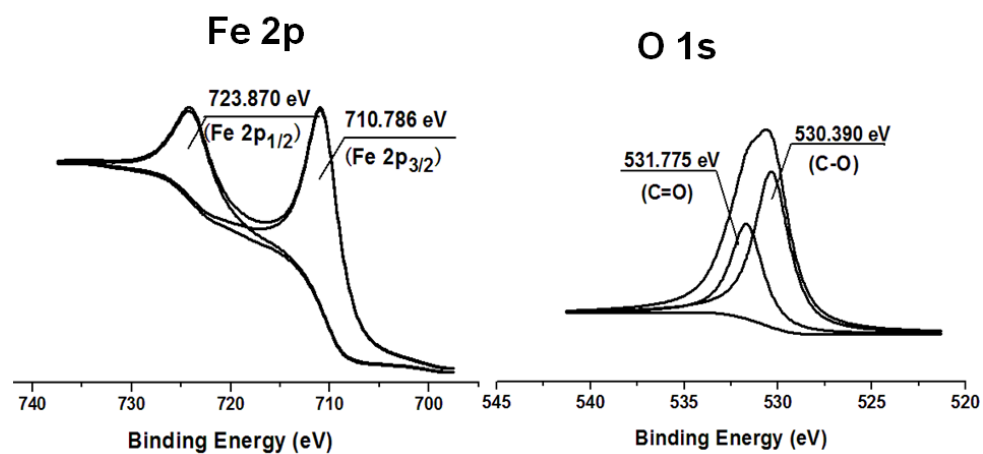

**Fig. S3** The Fe 2p X-ray photoelectron spectroscopy (XPS) spectra and O 1s XPS spectra of Fe<sub>3</sub>N-HCNB (a) and  $\alpha$ -Fe-HCNB (b).

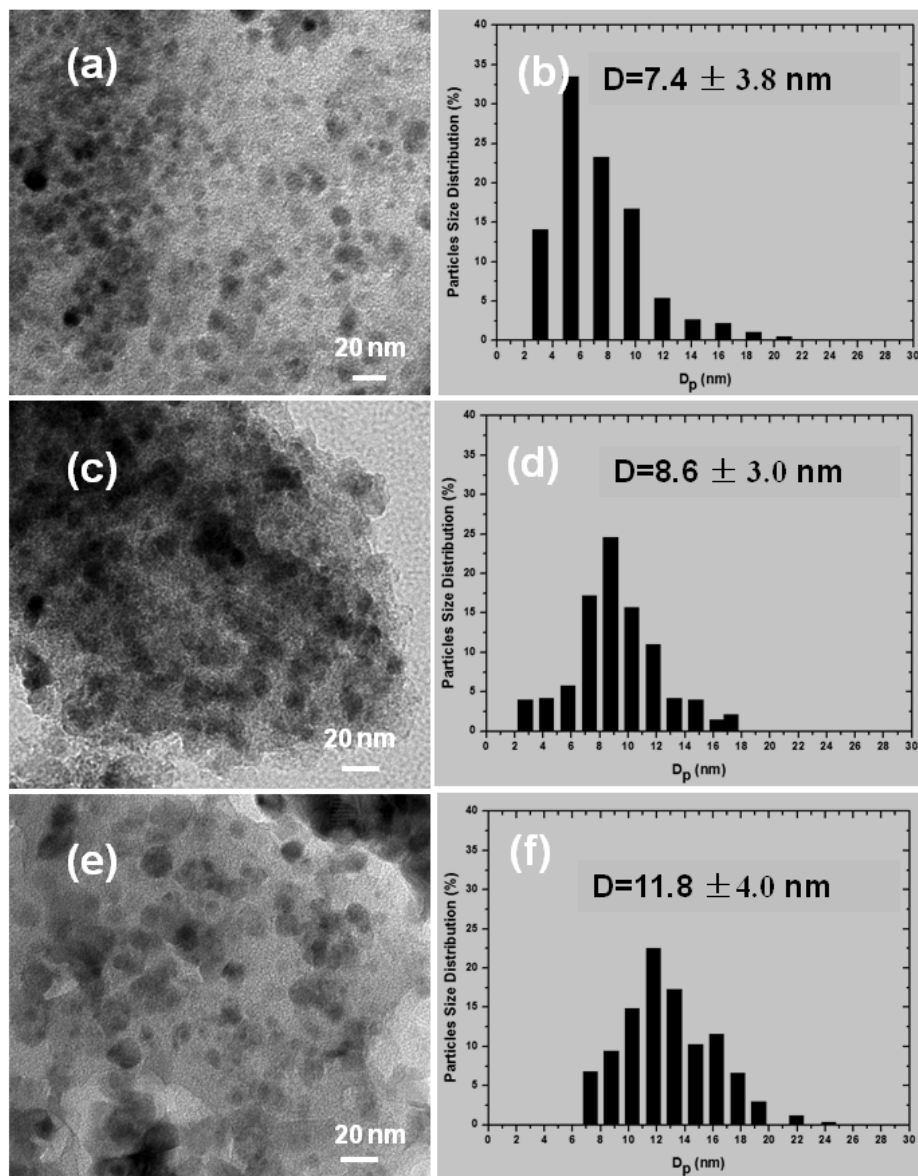

**Fig. S4** Size distributions of Fe<sub>3</sub>O<sub>4</sub>-HCNB (a, b), Fe<sub>3</sub>N-HCNB (c, d) and α-Fe-HCNB (e, f).

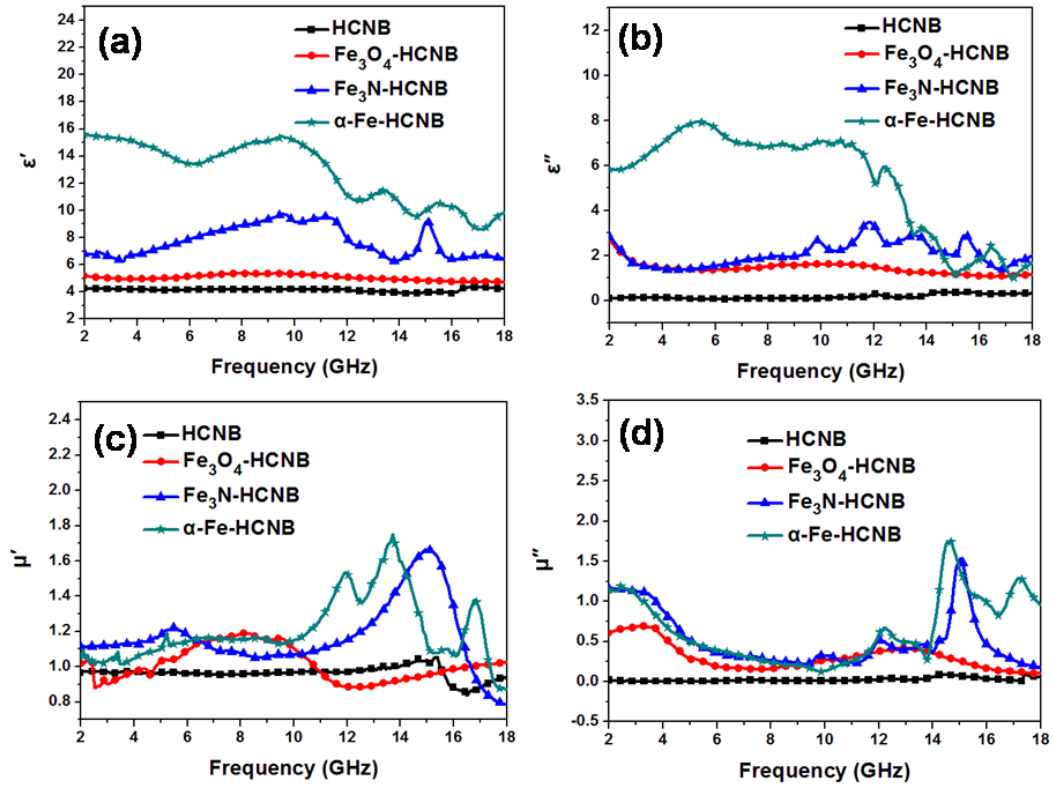

**Fig. S5** Frequency dependence on the real part of complex permittivity  $\epsilon'$  (a), imaginary part of complex permittivity  $\epsilon''$  (b), real part of complex permeability  $\mu'$  (c), and imaginary part of complex permeability  $\mu''$  (d) for HCNB, Fe<sub>3</sub>O<sub>4</sub>-HCNB, Fe<sub>3</sub>N-HCNB and α-Fe-HCNB.

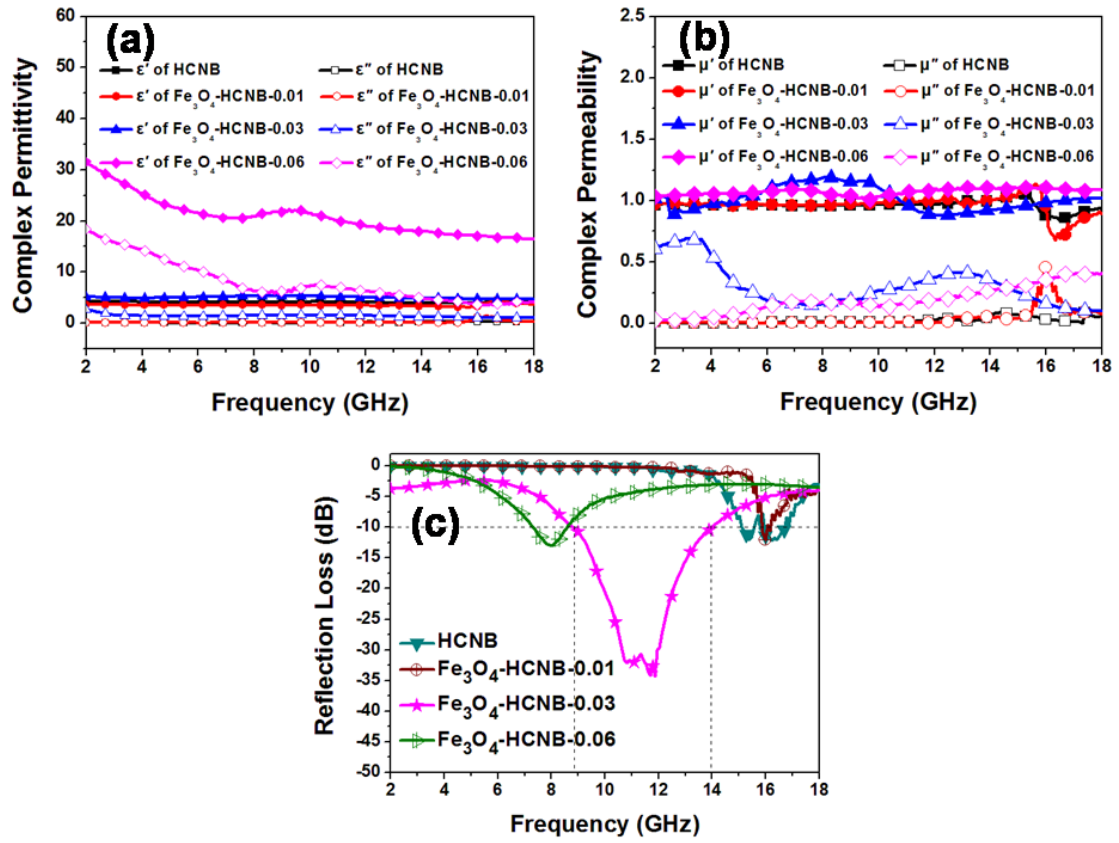

**Fig. S6** The complex permittivity (a) and permeability (b) of HCNB, Fe<sub>3</sub>O<sub>4</sub>-HCNB-0.01, Fe<sub>3</sub>O<sub>4</sub>-HCNB-0.03 and Fe<sub>3</sub>O<sub>4</sub>-HCNB-0.06.

The content of ferromagnetic NPs ( $\text{Fe}_3\text{O}_4$  and  $\text{Fe}_3\text{N}$ ) of  $\text{Fe}_3\text{O}_4$ -HCNBs and  $\text{Fe}_3\text{N}$ -HCNBs in Table 1 was calculated from the content of  $\text{Fe}_2\text{O}_3$  in final products derived from thermogravimetric analysis (TGA) of  $\text{Fe}_3\text{O}_4$ -HCNBs and  $\text{Fe}_3\text{N}$ -HCNBs in following Fig. S7, respectively.

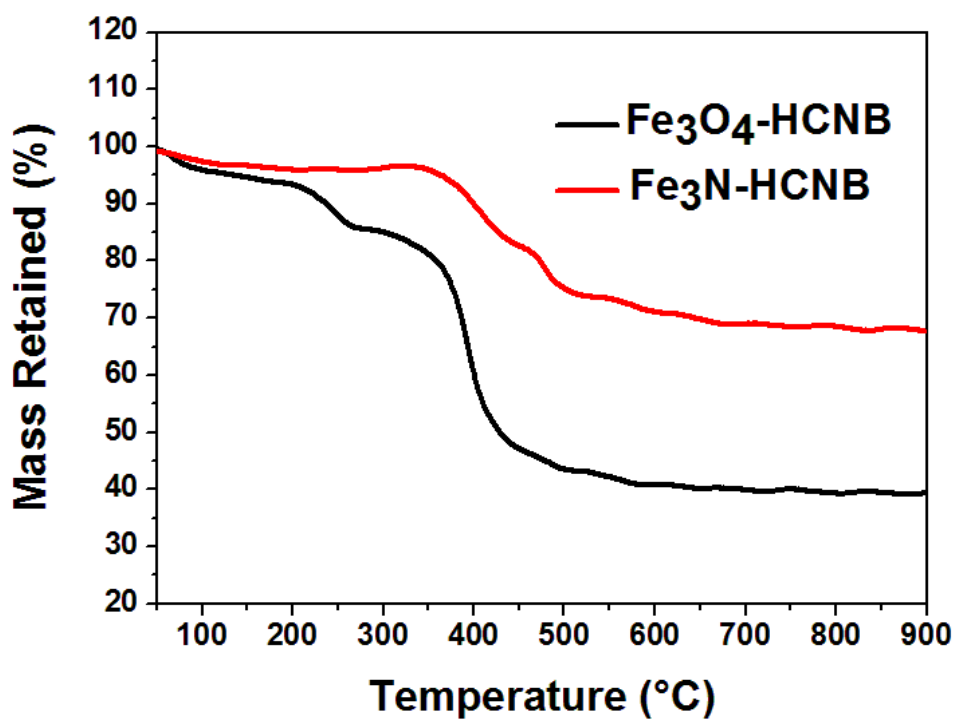

**Fig. S7** Thermogravimetry curves of  $\text{Fe}_3\text{O}_4$ -HCNB and  $\text{Fe}_3\text{N}$ -HCNB composites in air atmosphere.

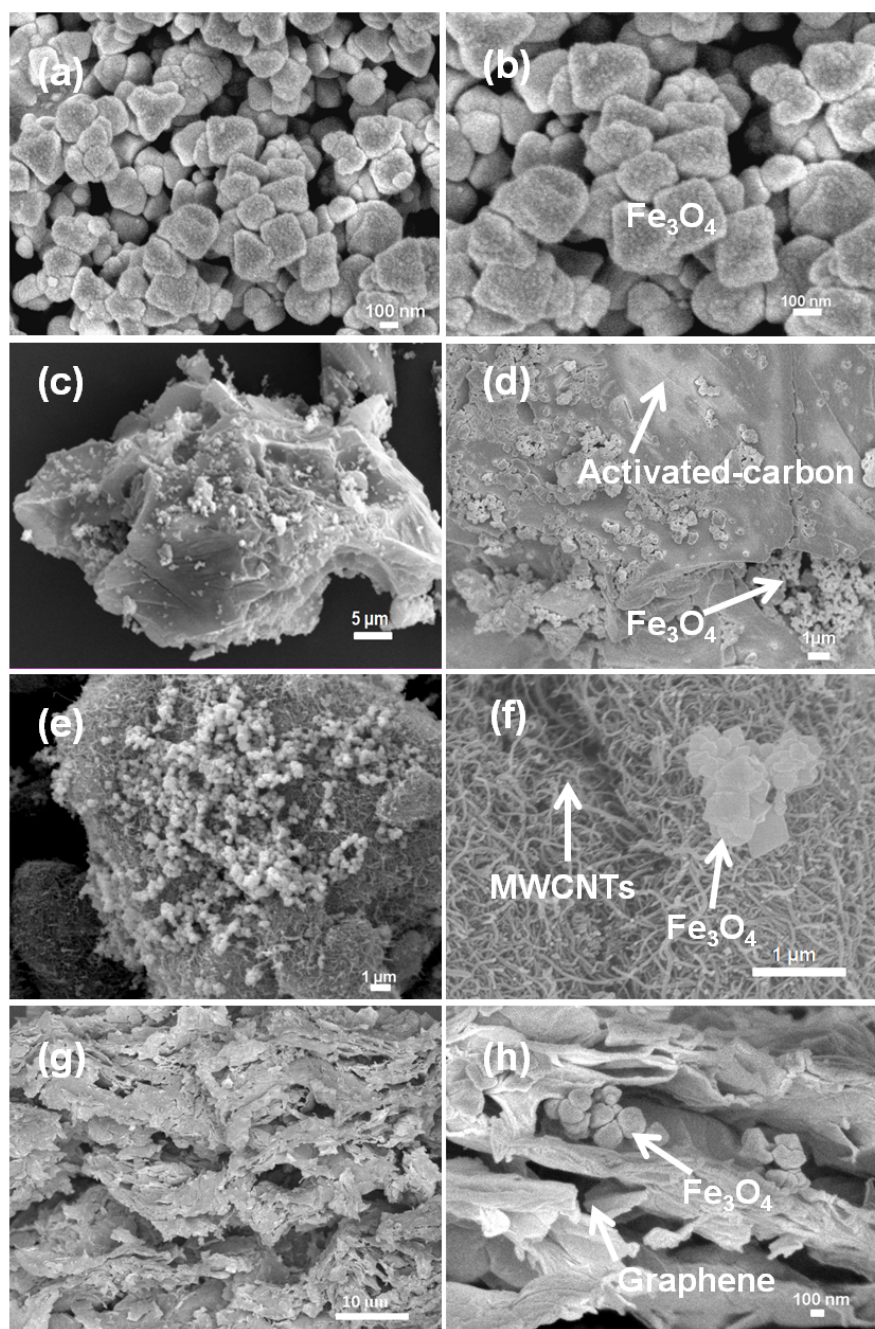

**Fig. S8** Field emission electron microscopy (FESEM) images of commercial  $\text{Fe}_3\text{O}_4$  NPs (a, b),  $\text{Fe}_3\text{O}_4$ /activated-carbon (c, d),  $\text{Fe}_3\text{O}_4$ /MWCNTs (e, f) and  $\text{Fe}_3\text{O}_4$ /graphene (g, h).



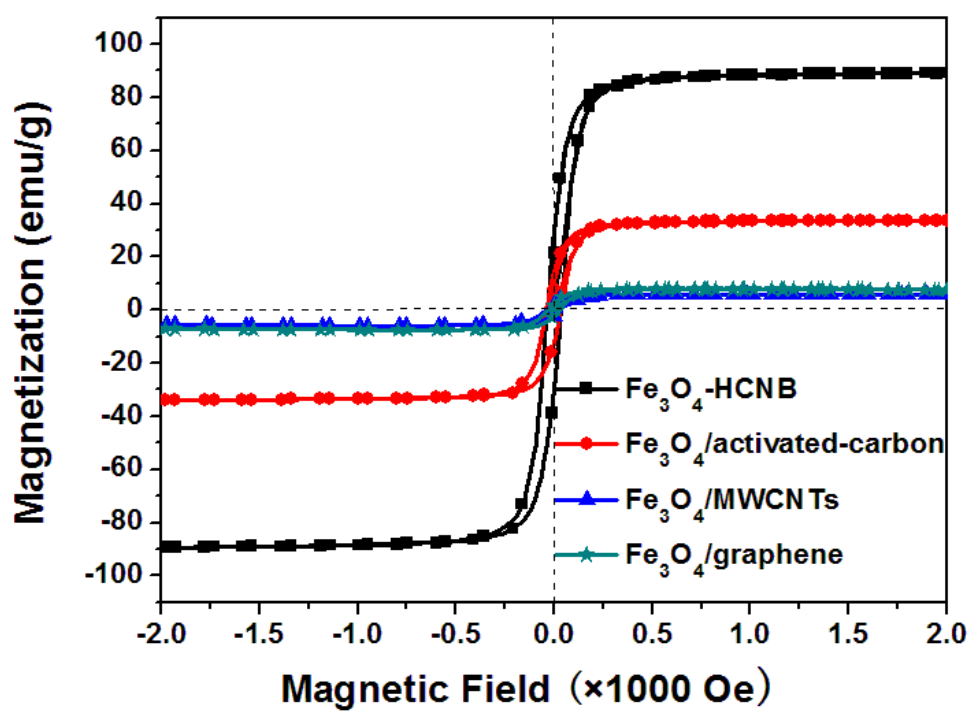

**Fig. S9** Magnetization hysteresis loops of  $\text{Fe}_3\text{O}_4\text{-HCNB}$ ,  $\text{Fe}_3\text{O}_4/\text{activated-carbon}$ ,  $\text{Fe}_3\text{O}_4/\text{MWCNTs}$  and  $\text{Fe}_3\text{O}_4/\text{graphene}$ .

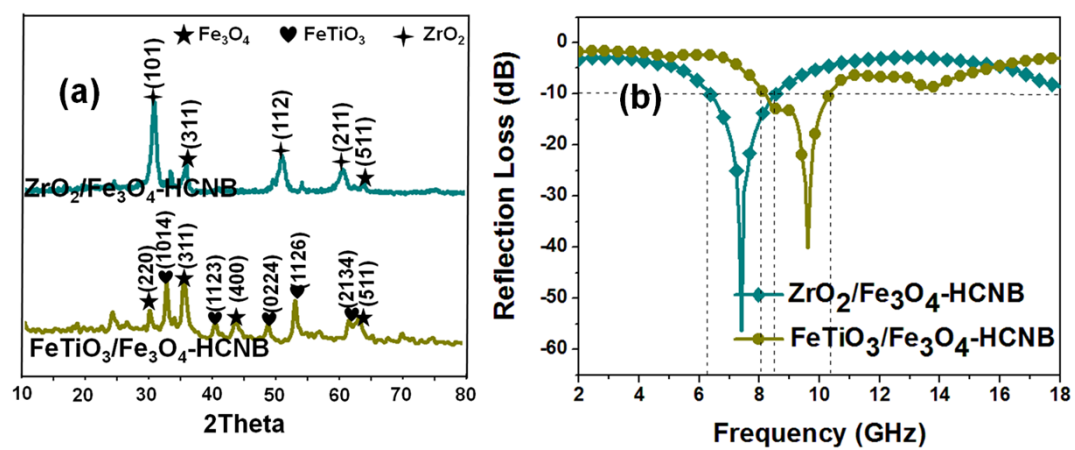

**Fig. S10** X-ray diffraction (XRD) patterns (a) and microwave reflection loss (b) of  $\text{FeTiO}_3/\text{Fe}_3\text{O}_4\text{-HCNB}$  and  $\text{ZrO}_2/\text{Fe}_3\text{O}_4\text{-HCNB}$  with thickness of 2 mm in the frequency of 2~18 GHz.
